# Supplementary material for: Opposite Profiles of Complement in Antiphospholipid Syndrome (APS) and Systemic Lupus Erythematosus (SLE) Among Patients With Antiphospholipid Antibodies (aPL)
Source: PubMed Central journal article supplement (PMC6514053; doi:10.3389/fimmu.2019.00885), 2019-05-07
Supplement: Table_1.pdf [file Table_1.pdf]

## **Opposite Profiles of Complement in Antiphospholipid Syndrome (APS) and Systemic Lupus Erythematosus (SLE) among Patients with Antiphospholipid Antibodies (aPL)**

Stephanie L. Savelli,<sup>1,2,4</sup> Robert A.S. Roubey,<sup>5</sup> Kathryn J. Kitzmiller,<sup>1,4</sup> Danlei Zhou,<sup>1,3,4</sup> Haikady N. Nagaraja,<sup>6</sup> Evan Mulvihill,<sup>3,4</sup> Fatima Barbar-Smilely,<sup>3,4</sup> Stacy P. Ardoin,<sup>3,4</sup> Yee Ling Wu,<sup>1,4,7</sup> and C. Yung Yu<sup>1,3,4</sup>

<sup>1</sup>The Research Institute at Nationwide Children's Hospital, <sup>2</sup>Division of Hematology/Oncology, <sup>3</sup>Division of Rheumatology, Nationwide Children's Hospital, 700 Children's Drive, Columbus Ohio 43205; <sup>4</sup>Department of Pediatrics, College of Medicine, The Ohio State University, Columbus, OH; <sup>5</sup>Division of Rheumatology, Allergy and Immunology, The University of North Carolina at Chapel Hill, Chapel Hill, NC; <sup>6</sup>Division of Biostatistics, College of Public Health, The Ohio State University, Columbus, OH and <sup>7</sup>Department of Microbiology and Immunology, Loyola University Chicago, IL

Supplementary Table

**Supplementary Table.** Multiple logistic regression analyses of independent parameters related to thromboses, recurrent pregnancy loss and SLE in aPL-positive subjects.

**A. Thrombosis**

Whole model summary:  $n=395$ ,  $DF=5$ ;  $\chi^2 = 74.1$ ;  $p=1.47 \times 10^{-14}$

| <b>a. Effect Likelihood Ratio Tests</b> |            |                        |
|-----------------------------------------|------------|------------------------|
| Source                                  | $\chi^2$   | $p$                    |
| C4                                      | 33.8       | $6.2 \times 10^{-9}$   |
| LAC                                     | 15.8       | 0.000069               |
| CFH                                     | 10.0       | 0.0016                 |
| SLE                                     | 6.88       | 0.0087                 |
| Gender                                  | 6.46       | 0.011                  |
| <b>b. Odds Ratios</b>                   |            |                        |
| Parameter                               | Odds Ratio | Remarks                |
| C4 (mg/dL)                              | 1.07       | higher C4, ↑risk       |
| C4 (range)                              | 45.1       |                        |
| LAC (+/-)                               | 2.56       | LAC +, ↑ risk          |
| CFH ( ) mg/dL                           | 0.97       | higher CFH, protective |
| CFH (range)                             | 0.045      |                        |
| SLE (+/-)                               | 0.55       | SLE +, protective      |
| Gender (F/M)                            | 0.46       | female, protective     |

**B. Arterial Thrombosis**

Whole model summary:  $n=452$ ,  $DF=2$ ;  $\chi^2 = 26.6$ ;  $p= 1.7 \times 10^{-6}$

| <b>a. Effect Likelihood Ratio Tests</b> |            |                      |
|-----------------------------------------|------------|----------------------|
| Source                                  | $\chi^2$   | $p$                  |
| C4B                                     | 18.1       | $2.2 \times 10^{-5}$ |
| LAC                                     | 8.33       | 0.0027               |
| <b>b. Odds Ratios</b>                   |            |                      |
| Parameter                               | Odds Ratio | Remarks              |
| C4B (mg/dL)                             | 1.09       | higher C4, ↑risk     |
| C4B (range)                             | 11.0       |                      |
| LAC (+/-)                               | 2.23       | LAC +, ↑ risk        |

**C. Venous Thrombosis**

Whole model summary:  $n=395$ ,  $DF=4$ ;  $\chi^2 = 36.8$ ;  $p= 2.0 \times 10^{-7}$

| <b>a. Effect Likelihood Ratio Tests</b> |          |        |
|-----------------------------------------|----------|--------|
| Source                                  | $\chi^2$ | $p$    |
| MBL                                     | 10.5     | 0.0012 |
| Gender (M)                              | 8.42     | 0.0037 |
| C4                                      | 6.62     | 0.010  |
| LAC                                     | 6.33     | 0.012  |

| <b>b. Odds Ratios</b> |                   |                        |
|-----------------------|-------------------|------------------------|
| <i>Parameter</i>      | <i>Odds Ratio</i> | <i>Remarks</i>         |
| MBL(mg/dL)            | 0.997             | higher MBL, protective |
| MBL (range)           | 0.059             |                        |
| LAC (+/ -)            | 1.84              | LAC +, ↑ risk          |
| C4 (mg/dL)            | 1.03              | higher C4, ↑risk       |
| C4 (range)            | 4.86              |                        |
| Gender (M)            | 2.31              | male, ↑risk            |

| <b>D. Recurrent pregnancy loss</b>                                            |                   |                         |
|-------------------------------------------------------------------------------|-------------------|-------------------------|
| <i>Whole model summary: n=336, DF=3; <math>\chi^2 = 14.0</math>; p=0.0029</i> |                   |                         |
| <b>a. Effect Likelihood Ratio Tests</b>                                       |                   |                         |
| <i>Source</i>                                                                 | $\chi^2$          | <i>p</i>                |
| C4                                                                            | 6.69              | 0.0097                  |
| ACLA-IgG                                                                      | 4.76              | 0.029                   |
| CFH                                                                           | 4.59              | 0.032                   |
|                                                                               |                   |                         |
| <b>b. Odds Ratios</b>                                                         |                   |                         |
| <i>Term</i>                                                                   | <i>Odds Ratio</i> | <i>Remarks</i>          |
| C4 (mg/dL)                                                                    | 1.04              | higher C4, ↑ risk       |
| C4 (range)                                                                    | 7.21              |                         |
| ACLA IgG (GPL)                                                                | 1.01              | higher ACLA-IgG, ↑ risk |
| ACLA IgG (range)                                                              | 32.8              |                         |
| CFH (mg/dL)                                                                   | 0.976             | higher CFH, protective  |
| CFH (range)                                                                   | 0.070             |                         |
|                                                                               |                   |                         |

| <b>E. Nominal Logistic Fit for SLE (with C3)</b>                                              |                   |                        |
|-----------------------------------------------------------------------------------------------|-------------------|------------------------|
| <i>Whole model summary: n=457, DF=3; <math>\chi^2 = 40.81</math>; p=7.2 x 10<sup>-9</sup></i> |                   |                        |
| <b>a. Effect Likelihood Ratio Tests</b>                                                       |                   |                        |
| <i>Source</i>                                                                                 | $\chi^2$          | <i>p</i>               |
| C3                                                                                            | 19.2              | 1.2 x 10 <sup>-5</sup> |
| ACLA IgG                                                                                      | 17.3              | 3.2 x 10 <sup>-5</sup> |
| Gender                                                                                        | 6.03              | 0.014                  |
|                                                                                               |                   |                        |
| <b>b. Odds Ratios</b>                                                                         |                   |                        |
| <i>Term</i>                                                                                   | <i>Odds Ratio</i> | <i>Remarks</i>         |
| C3 (mg/dL)                                                                                    | 0.988             | low C3, ↑ risk         |
| C3 (range)                                                                                    | 0.042             |                        |
| ACLA IgG (GPL)                                                                                | 0.991             | low ACLA-IgG, ↑ risk   |
| ACLA IgG (range)                                                                              | 0.0033            |                        |
| Gender (F/M)                                                                                  | 1.98              | female, ↑ risk         |
|                                                                                               |                   |                        |
|                                                                                               |                   |                        |

| <b>F. Nominal Logistic Fit for SLE (with C4)</b>                                                        |                   |                      |
|---------------------------------------------------------------------------------------------------------|-------------------|----------------------|
| <i>Whole model summary: n=456, DF=3; <math>\chi^2 = 33.47</math>; <math>p=2.6 \times 10^{-7}</math></i> |                   |                      |
| <b>a. Effect Likelihood Ratio Tests</b>                                                                 |                   |                      |
| <i>Source</i>                                                                                           | $\chi^2$          | <i>p</i>             |
| ACLA IgG                                                                                                | 15.0              | 0.0001               |
| C4                                                                                                      | 12.7              | 0.0004               |
| Gender                                                                                                  | 4.82              | 0.028                |
| <b>b. Odds Ratios</b>                                                                                   |                   |                      |
| <i>Term</i>                                                                                             | <i>Odds Ratio</i> | <i>Remarks</i>       |
| ACLA IgG (GPL)                                                                                          | 0.992             | low ACLA-IgG, ↑ risk |
| ACLA-IgG (range)                                                                                        | 0.0058            |                      |
| C4 (mg/dL)                                                                                              | 0.966             | low C4, ↑ risk       |
| C4 (range)                                                                                              | 0.147             |                      |
| Gender (F/M)                                                                                            | 1.84              | female, ↑ risk       |
